# Supplementary material
Source: PubMed Central journal article supplement (PMC3564546)
Supplement: NIHMS366142-supplement-1.pdf [file NIHMS366142-supplement-1.pdf]

# Suppl. Fig. 1

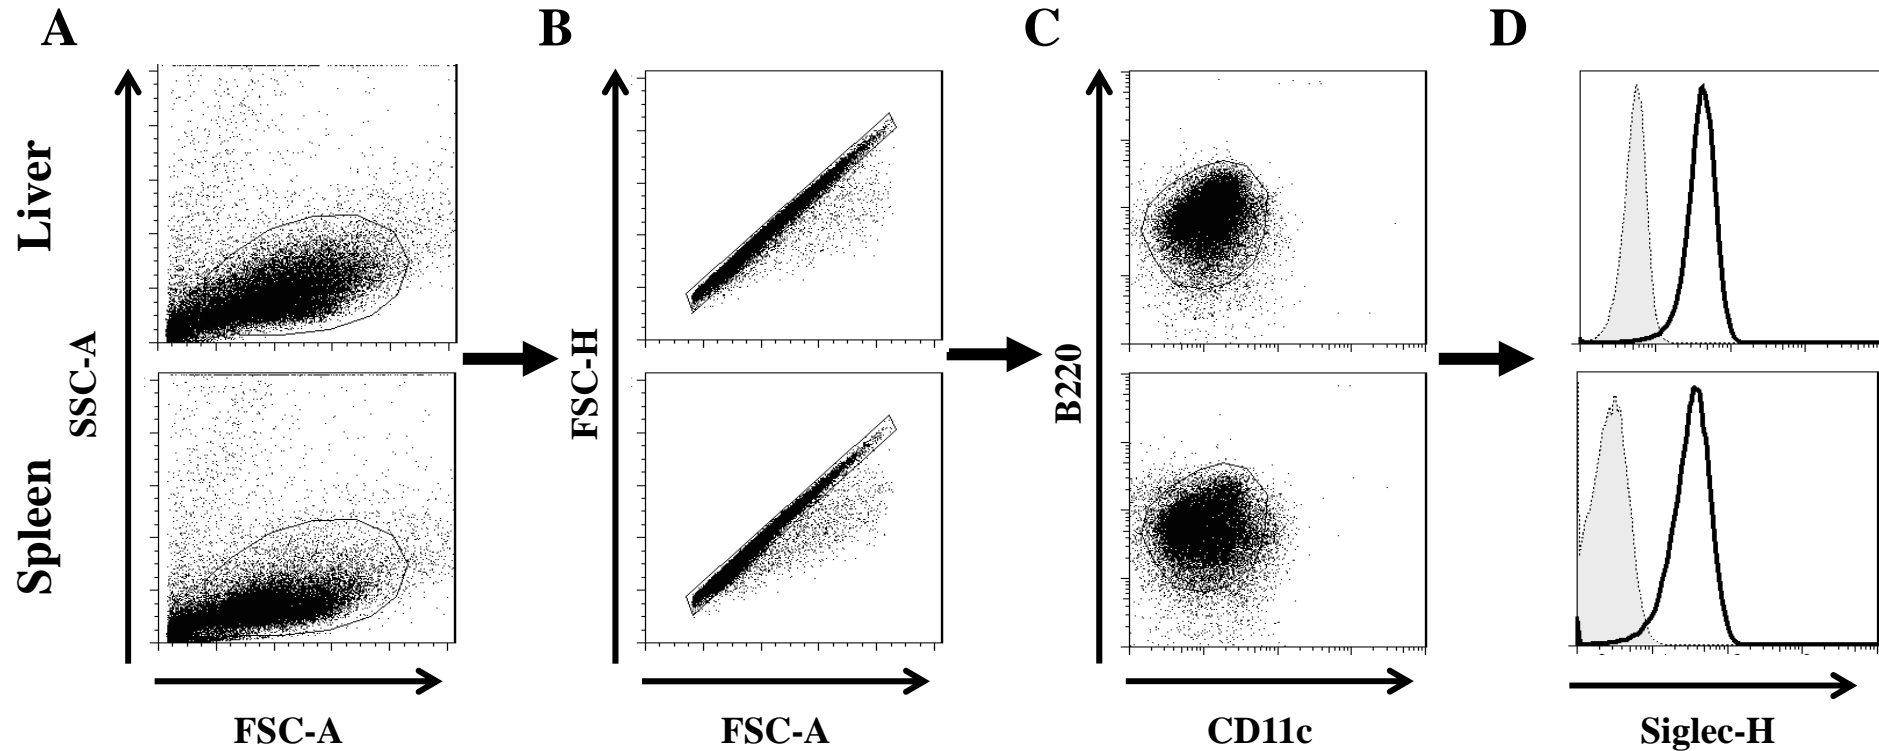

**SUPPLEMENTAL FIGURE 1.** Gating strategy for flow cytometric analysis of PDCA-1<sup>+</sup> immunobead-purified liver and spleen pDC. For identification of pDC, cells were stained using antibodies against B220 and CD11c. A, First, a live cell gate was made using forward (FSC) versus side (SSC) scatter plot. Cell doublets were excluded using (B) FSC-Height (H) versus FSC-Area (A). Analysis of surface molecule expression was analyzed on B220<sup>+</sup>CD11c<sup>low</sup> cells (C), including the pDC-specific marker, Siglec-H (D).

## Suppl. Fig. 2

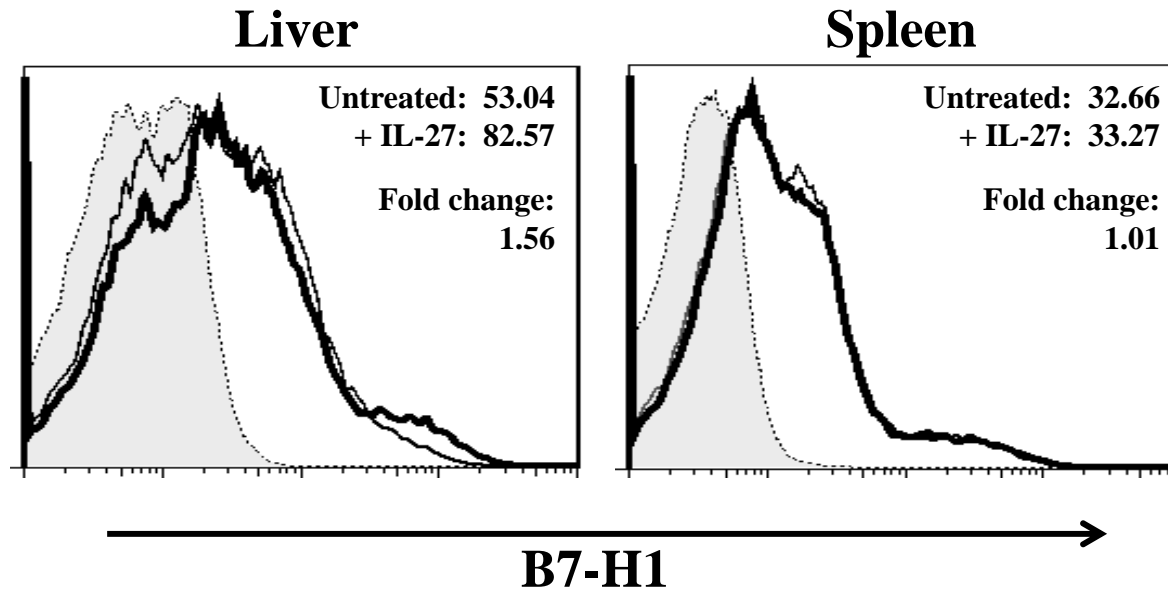

**SUPPLEMENTAL FIGURE 2.** Histograms depicting B7-H1 expression at baseline and following exposure to IL-27. Freshly-isolated liver and spleen PDCA-1<sup>+</sup> pDC from Flt3L-mobilized, C57BL/6J WT mice were cultured in the presence of 25  $\mu$ g/ml CpG B ODN for 18 h, collected and analyzed by 5-color flow cytometry. Surface expression of B7-H1 was analyzed on B220<sup>+</sup>CD11c<sup>low</sup> gated cells as previously described in Materials in Methods. Relative MFI of untreated (thin line) and IL-27-conditioned (bold line) liver and spleen pDC is shown, along with the fold change in B7-H1 MFI following exposure to IL-27.

# Suppl. Fig. 3

**SUPPLEMENTAL FIGURE 3.** *Ebi3*<sup>-/-</sup> pDC are phenotypically similar to WT pDC in the steady state and following TLR9 stimulation. Freshly-isolated liver and spleen PDCA-1<sup>+</sup> pDC from Flt3L-mobilized, WT or *Ebi3*<sup>-/-</sup> mice were cultured in the presence of 1 μg/ml CpG B ODN for 18 h, collected and analyzed by 5-color flow cytometry. Surface protein expression was analyzed on B220<sup>+</sup>CD11c<sup>low</sup> gated cells (Suppl. Fig. 1) as previously described in Materials in Methods. Relative MFI and percent positive cells were average from 3 independent experiments, \* *p* < 0.05.

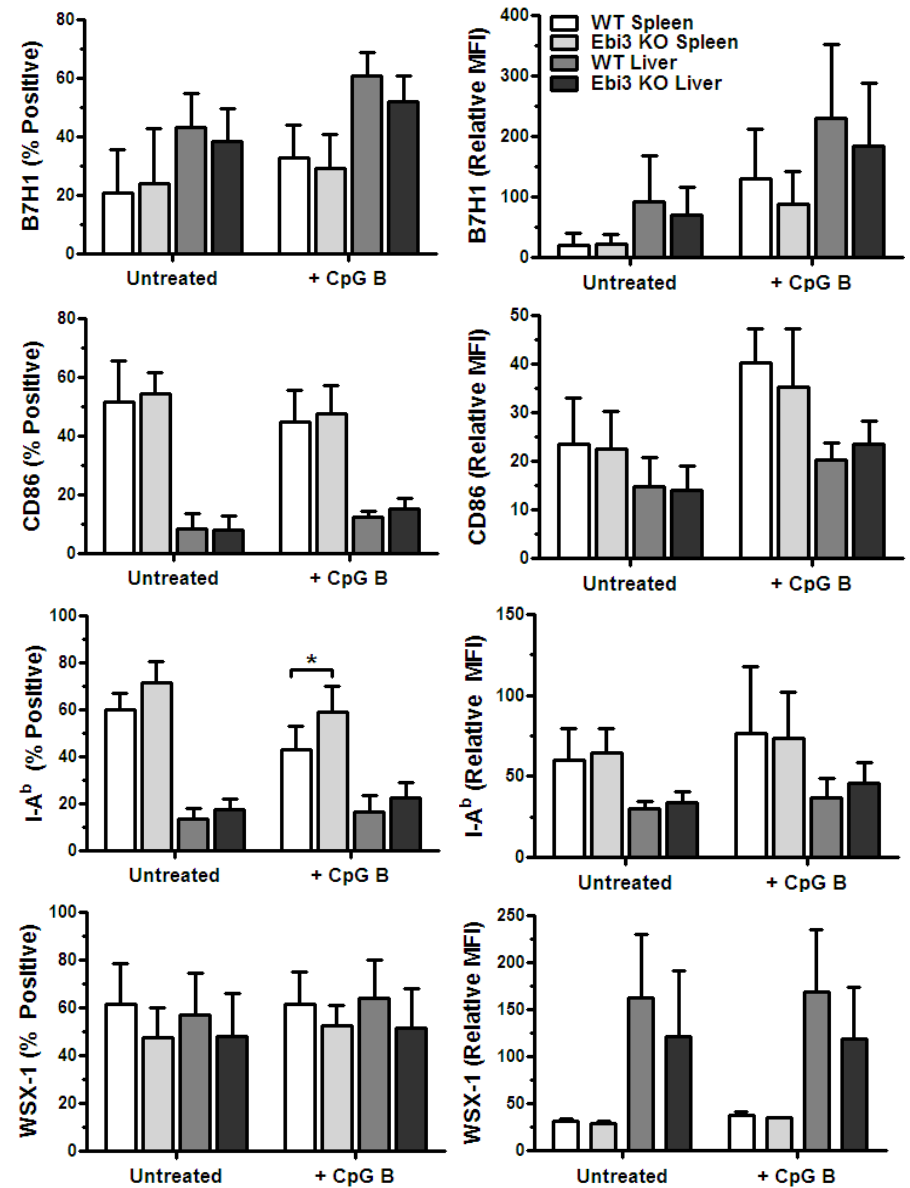

# Suppl. Fig. 4

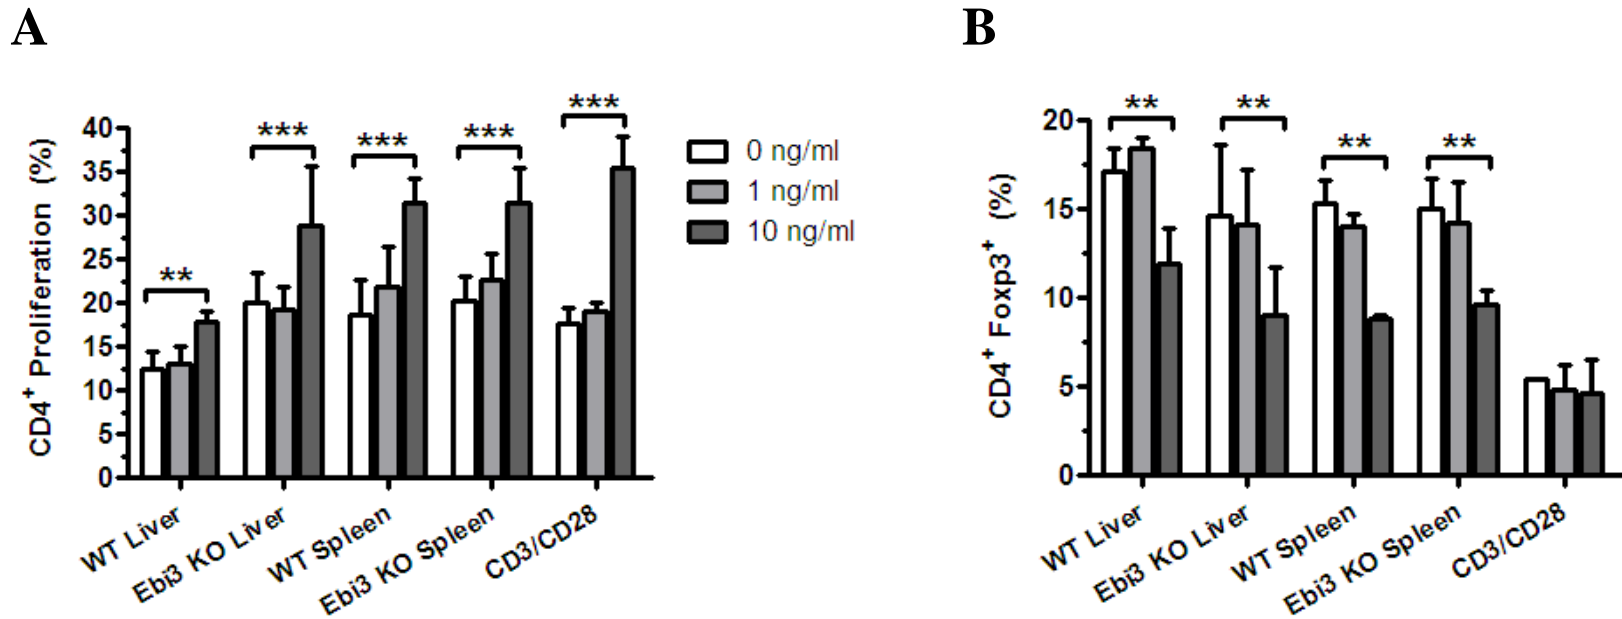

**SUPPLEMENTAL FIGURE 4.** Exogenous IL-27 directly enhances T cell proliferation and reduces Foxp3 expression when added directly to MLR. Freshly-isolated liver and spleen PDCA-1<sup>+</sup> pDC from Flt3L-mobilized, C57BL/6J WT or Ebi3<sup>-/-</sup> mice were cultured with allogeneic BALB/c splenic T cells in the absence (white bars) or presence of 1 (light gray bars) or 10 (dark gray bars) ng/ml IL-27 for 3 d. Cultures were harvested and analyzed by flow cytometry for proliferation by CFSE dilution (A) and Foxp3 expression (B). T cells were also stimulated with plate-bound anti-CD3 and soluble CD28 (A-B). Results are an average of  $n = 2$  independent experiments, \*\*  $p < 0.01$ , \*\*\*  $p < 0.001$ .
